# Supplementary material for: Analysis of vibronic coupling in a 4f molecular magnet with FIRMS
Source: Springer Nature journal article supplement (doi:10.1038/s41467-022-28352-2), 2022-02-11
Supplement: 41467_2022_28352_MOESM32_ESM.pdf [file 41467_2022_28352_MOESM32_ESM.pdf]

Title: Supplementary Movie 1  
Description: Vibrational mode 4

Title: Supplementary Movie 2  
Description: Vibrational mode 5

Title: Supplementary Movie 3  
Description: Vibrational mode 7

Title: Supplementary Movie 4  
Description: Vibrational mode 8

Title: Supplementary Movie 5  
Description: Vibrational mode 14

Title: Supplementary Movie 6  
Description: Vibrational mode 15

Title: Supplementary Movie 7  
Description: Vibrational mode 20

Title: Supplementary Movie 8  
Description: Vibrational mode 21

Title: Supplementary Movie 9  
Description: Vibrational mode 22

Title: Supplementary Movie 10  
Description: Vibrational mode 23

Title: Supplementary Movie 11  
Description: Vibrational mode 26

Title: Supplementary Movie 12  
Description: Vibrational mode 27

Title: Supplementary Movie 13  
Description: Vibrational mode 34

Title: Supplementary Movie 14  
Description: Vibrational mode 35

Title: Supplementary Movie 15  
Description: Vibrational mode 36

Title: Supplementary Movie 16  
Description: Vibrational mode 37

Title: Supplementary Movie 17  
Description: Vibrational mode 38

Title: Supplementary Movie 18  
Description: Vibrational mode 39

Title: Supplementary Movie 19  
Description: Vibrational mode 40

Title: Supplementary Movie 20  
Description: Vibrational mode 41

Title: Supplementary Movie 21  
Description: Vibrational mode 42

Title: Supplementary Movie 22  
Description: Vibrational mode 43

Title: Supplementary Movie 23  
Description: Vibrational mode 44

Title: Supplementary Movie 24  
Description: Vibrational mode 45

Title: Supplementary Movie 25  
Description: Vibrational mode 58

Title: Supplementary Movie 26  
Description: Vibrational mode 59

Title: Supplementary Movie 27  
Description: Vibrational mode 60

Title: Supplementary Movie 28  
Description: Vibrational mode 61

Title: Supplementary Movie 29  
Description: Vibrational mode 142

Title: Supplementary Movie 30  
Description: Vibrational mode 143
